# Supplementary material for: Efficacy of Traditional Herbal Medicine Treatment Based on Pattern Identification for Idiopathic Parkinson’s Disease: A Protocol for Systematic Review and Meta-Analysis
Source: Hindawi journal article supplement (doi:10.1155/2022/4777849), 2022-04-30
Supplement: f1 [file 4777849.f1.zip]

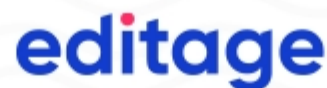

# Editing Certificate

This document certifies that the manuscript listed below has been edited to ensure language and grammar accuracy and is error free in these aspects. The logical presentation of ideas and the structure of the paper were also checked during the editing process. The edit was performed by professional editors at Editage, a division of Cactus Communications. The author's core research ideas were not altered in any way during the editing process. The quality of the edit has been guaranteed, with the assumption that our suggested changes have been accepted and the text has not been further altered without the knowledge of our editors.

## MANUSCRIPT TITLE

**Efficacy of traditional herbal medicine treatment based on pattern identification for idiopathic Parkinson's disease: A protocol for systematic review and meta-analysis**

## AUTHORS

**Purumea Jun, HuiYan Zhao, Ojin Kwon, and Jung-Hee Jang**

## ISSUED ON

**October 28, 2021**

## JOB CODE

**BJAWV\_15\_3**

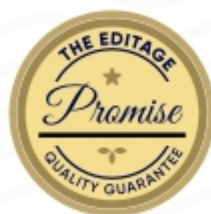

*Vikas Narang*

**Vikas Narang**  
Chief Operating Officer - Editage

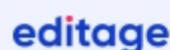

Editage, a brand of Cactus Communications, offers professional English language editing and publication support services to authors engaged in over 1300 areas of research. Through its community of experienced editors, which includes doctors, engineers, published scientists, and researchers with peer review experience, Editage has successfully helped authors get published in internationally reputed journals. Authors who work with Editage are guaranteed excellent language quality and timely delivery.

## GLOBAL :

+1(833) 979-0061 | [request@editage.com](mailto:request@editage.com)

## KOREA :

02-3478-4396 | [submit-korea@editage.com](mailto:submit-korea@editage.com)

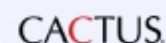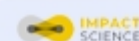

[impact.science](https://impact.science)

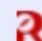

[researcher.life](https://researcher.life)

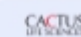

[lifesciences.cactusglobal.com](https://lifesciences.cactusglobal.com)
