# Supplementary material for: Efficacy of Traditional Herbal Medicine Treatment Based on Pattern Identification for Idiopathic Parkinson's Disease: A Protocol for Systematic Review and Meta-Analysis
Source: Evid Based Complement Alternat Med. 2022 Apr 30;2022:4777849. doi: 10.1155/2022/4777849 (PMC9078772; doi:10.1155/2022/4777849)
Supplement: Supplementary Materials — Table S1. PRISMA-P (Preferred Reporting Items for Systematic Review and Meta-Analysis Protocols) 2015 checklist: recommended items to address in a systematic review protocol. Table S2. Search strategy for databases other than PubMed. Figure S1. PRISMA flow diagram of the study selection process. . [file 4777849.f1.zip]

Archive with 5 entries (5 files):
- 4777849.f1/2._Table_S1.1_R2_2022_0401.doc
- 4777849.f1/3._Table_S1.2_R2_2022_0401.docx
- 4777849.f1/4._Table_S2_R2_2022_0401.docx
- 4777849.f1/5._Figure S1 (1).docx
- 4777849.f1/Certificate of English editing.pdf
